# Supplementary material for: High-Throughput Sequencing Reveals Novel microRNAs Involved in the Continuous Flowering Trait of Longan (Dimocarpus longan Lour.)
Source: MDPI journal article supplement (doi:10.3390/ijms232415565), 2022-12-08
Supplement: s1 [file s1]

qRT-PCR analysis of transcript levels

**Table S1.** The primer sequences of miRNAs and gene for qPCR analysis.

| Gene name    | Primer sequence                                        |
|--------------|--------------------------------------------------------|
| novel-miR137 | CATTACTGCTGGAGCTTT                                     |
| novel-miR76  | GAGGATTACAATGGATTTTGT                                  |
| novel-miR37  | TTGATTGCGGTCTTCAAGAAG                                  |
| csi-miR3954  | TGGACAGAGAAATCACGGTCA                                  |
| novel-miR101 | TTTACTTGCAAAAGAGGAACTC                                 |
| Dlo_010737.1 | F: AGAAAGTGGATGGAAAGGC<br>R: TGTAGCGAGTGAAAGTGGTTAG    |
| Dlo_009577.1 | F: TAGTGGAAGTGGCGAGTCTC<br>R: ATACCAAATGGCGATGCC       |
| Dlo_027647.1 | F: CGAGGATAACTTGATTCCCTG<br>R: GACTTAGATGTCCACGCTCAG   |
| Dlo_034106.1 | F: TGCTTCCCTTGGCAAAGT<br>R: AGGTTCAAGATGTGGGCAA        |
| Dlo_016181.1 | F: CAGGGAGAGAATAGATGAGCA<br>R: GGGAGATACAACATTGAGCG    |
| Dlo_025646.1 | F: GACTATGGTATGTCCGTGTCAA<br>R: CATCTTTGTTTCGCAGCCA    |
| Dlo_000175.1 | F: TGGCTTATGAGATTGGAAGG<br>R: AGGGACCTGGTTTAGAGGAT     |
| Dlo_018643.1 | F: GGTGGTGGGAAGAGTTATCG<br>R: TCGCCAAACAAAGCAACC       |
| Dlo_018664.1 | F: ACCACACAAGGAGATGGCA<br>R: ACTGTTGAGGAGCACACCT       |
| Dlo_033804.1 | F: CGAGTCTCTCACCATTCACTG<br>R: TCCGAACAACCTCATAGTCA    |
| Dlo_029015.2 | F: TTCATCCAGTTTGAGCCAG<br>R: TCTACGGGTAAACATCAGGTTC    |
| Dlo_027146.1 | F: TGTCACCGAATACCACCTATG<br>R: TGCTGGAGGATTTAGATGC     |
| Dlo_015219.1 | F: CACAAATCTGATGGTGAGACC<br>R: CAGCAGTTAGAGACGCTCCT    |
| JH-miR137-RT | GTCGTATCCAGTGCAGGGTCCGAGGTAT<br>TCGCACTGGATACGACAAAGCT |
| JH-miR137    | F: AGACGATGCATTACTGCTGGA<br>R: CAGTGCAGGGTCCGAGGT      |

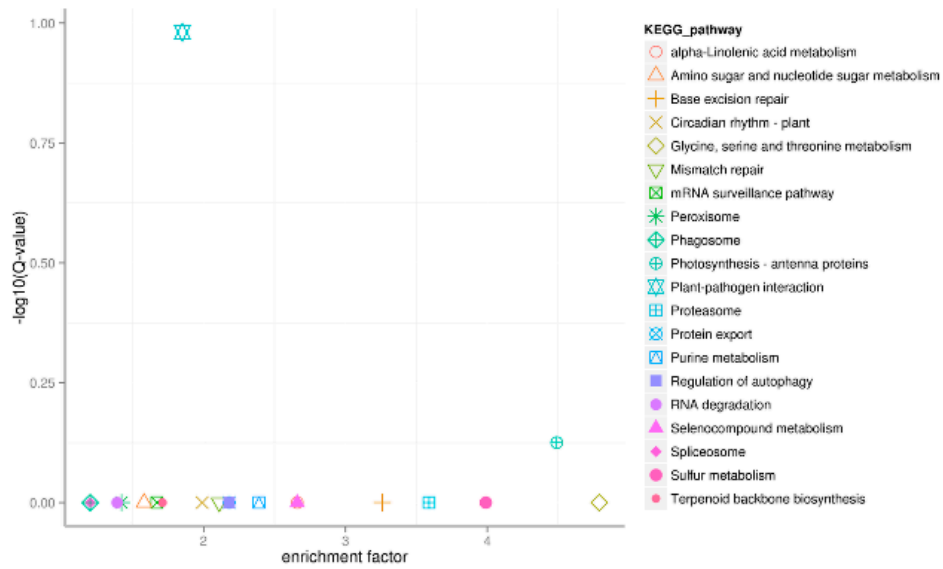

**Figure S1.** Differential expression miRNA target gene KEGG pathway enrichment scatter plot.

### Recombinant vector construction and verification

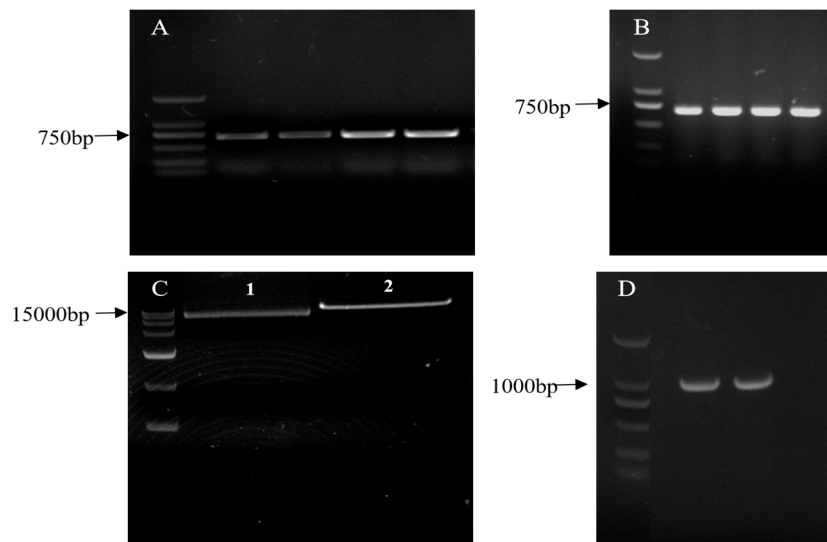

**Figure S2.** PCR validation of *E. coli* containing pSAK277-MIR137. (A-B) The amplified fragments were cloned into the pMD-18-T vector. (C) The pSAK277 vector was digested using restriction enzymes, which contained EcoR I and Hind III restriction sites, respectively. (D) The results of agarose gel electrophoresis indicated that the recombinant vector was successfully constructed.

### Identification of transgenic *Arabidopsis thaliana*

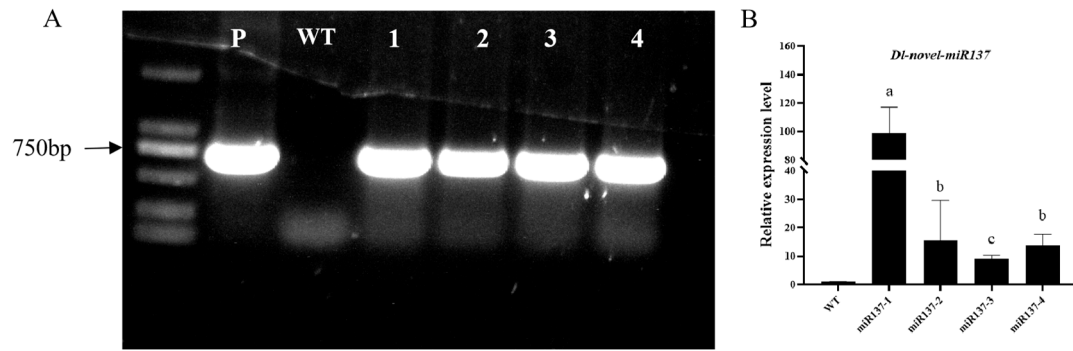

**Figure S3.** PCR analysis of MIR137-transgenic *Arabidopsis thaliana*. (A) PCR analysis of MIR137-transgenic *Arabidopsis thaliana*; P, pSAK277-MIR137; WT, Wild type plant; 1~4, MIR137-transgenic plant; (B) Expression analysis of Dl-novel-miR137 in transgenic *Arabidopsis*. Error bars show SE of the mean. Letter on the columns not the same means significantly different at ( $P < 0.05$ ).
